# Supplementary material
Source: publisher figshare collection journal article supplement (https://acs.figshare.com/ndownloader/files/4655071)
Supplement: Supplementary file 1 [file 4655071]

---

## Supporting Information

---

### One-Pot Synthesis of Core-Modified Meso Aryl Calix[5]phyrin and N-Fused [24]pentaphyrin:

Sabapathi Gokulnath and Tavarekere K. Chandrashekar\*

| S. NO. | Description                                         | Page No. |
|--------|-----------------------------------------------------|----------|
| 1.     | Experimental Procedures                             | 2-3      |
| 2.     | FAB Mass spectrum 7- 10                             | 4-5      |
| 3.     | $^1\text{H}$ NMR spectrum of 7- 10                  | 6-9      |
| 4.     | $^1\text{H}$ - $^1\text{H}$ COSY spectrum of 8 & 10 | 10-11    |
| 5.     | $^1\text{H}$ NMR spectrum of protonated 8           | 12       |
| 6.     | Electronic absorption spectra of 7- 10              | 13-14    |
| 7.     | Views of supramolecular structure of 8              | 15-18    |
| 8.     | Crystal data and structure refinement for 8         | 19       |

## Experimental

### General

All NMR solvents were used as received. Solvents like dichloromethane, tetrahydrofuran and n-hexane were purified and distilled by standard procedure. Electronic spectra were recorded on Perkin-Elmer Lambda 20 UV/Vis spectrophotometer. Proton NMR spectra were obtained on a 400 MHz JEOL spectrometer in CDCl<sub>3</sub>. FAB-MS spectra were obtained on a JEOL-SX-120/DA6000 spectrometer. Thiophene diol, Selenophene diol and Tetrapyrane are synthesized using methods described in reference in the manuscript and stored under inert atmosphere.

### Syntheses:

**7:** A mixture of **4** (0.133g, 0.35 mmol) and tetrapyrane **6** (0.28g, 0.35mmol) were dissolved in dry dichloromethane (200 ml) and stirred under nitrogen atmosphere for 5 min. *Para*-toluenesulfonic acid (PTSA) (0.02g, 0.1 mmol) was added and the stirring was continued for 90 min. DDQ (0.16g, 0.7 mmol) was added and the reaction mixture was further stirred for 90 min. The solvent was evaporated in vacuum. The residue was purified by chromatography on a basic alumina column, first green band which was eluted with dichloromethane/petroleum ether (1:5) gave **7** in (0.025g, 11.2%); <sup>1</sup>H NMR (300 MHz, CDCl<sub>3</sub>, 25° C, TMS): δ = 11.15 (brs, NH, 2H), 7.75 (m, 2H), 7.14 (d, J = 4.1Hz, 2H), 7.03 (s, 2H), 6.99 (s, 2H), 6.92 (d, J = 4.3Hz, 2H), 6.51 (d, J = 4.4Hz, 2H), 4.0 (s, 1H), 2.35 (s, 6H), 2.12 (s, 6H), 2.05 (s, 6H); FAB-MS: m/z (%): 1141 (100) [M<sup>+</sup>]; UV/Vis (CH<sub>2</sub>Cl<sub>2</sub>): λ<sub>max</sub> (ε x 10<sup>-4</sup> M<sup>-1</sup>cm<sup>-1</sup>): 386 (2.1), 466 (4.1), 494 (4.6), 708 (1.1). elemental analysis: calcd (%) for C<sub>61</sub>H<sub>35</sub>F<sub>15</sub>N<sub>4</sub>S: C 64.21, H 3.09, N 4.91; found: C 64.25, H 2.89, N 4.15.

**8:** A mixture of **5** (0.16g, 0.38 mmol) and tetrapyrane **6** (0.3g, 0.38mmol) were dissolved in dry dichloromethane (200 ml) and stirred under nitrogen atmosphere for 5 min. *Para*-toluenesulfonic acid (PTSA) (0.021g, 0.1 mmol) was added and the stirring was

continued for 90 min. DDQ (0.15 g, 0.76 mmol) was added and the reaction mixture was further stirred for 90 min. The solvent was evaporated in vacuum. The residue was purified by chromatography on a basic alumina column, first green band which was eluted with dichloromethane/petroleum ether (1:5) gave **8** in (0.035g, 13.4%);  $^1\text{H}$  NMR (300 MHz,  $\text{CDCl}_3$ , 25° C, TMS):  $\delta$  = 9.04 (brs, NH, 2H), 7.9 (m, 2H), 7.36 (s, 2H), 7.09 (m, 4H), 7.03(s, 2H), 6.96 (d,  $J$  = 4.4Hz, 2H), 6.68 (d,  $J$  = 4.5Hz, 2H), 2.56 (s, 1H), 2.43(s, 6H), 2.14 (s, 6H), 2.1 (s, 6H); FAB-MS:  $m/z$  (%): 1187.85(70) [ $\text{M}^+$ ]; UV/Vis ( $\text{CH}_2\text{Cl}_2$ ):  $\lambda_{\text{max}}$  ( $\epsilon \times 10^{-4} \text{ M}^{-1}\text{cm}^{-1}$ ): 412 (5.5), 490 (7.5), 691 (2.5). elemental analysis: calcd (%) for  $\text{C}_{61}\text{H}_{35}\text{F}_{15}\text{N}_4\text{Se}$ : C 61.68, H 2.97, N 4.72; found: C 62.32, H 2.76, N 4.45.

**9**: The second orange band (after the green fraction **7**) which was eluted with dichloromethane/petroleum ether (2:3) gave **9** in (0.07g, 14.6%);  $^1\text{H}$  NMR (300 MHz,  $\text{CDCl}_3$ , 25° C, TMS):  $\delta$  = 18.02 (brs, 1H, NH), 14.39 (m, 1H), 13.31 (d,  $J$  = 3.8Hz, 1H), 12.97 (d,  $J$  = 3.8Hz, 4H), 6.63 (d,  $J$  = 9Hz, 4H, Ar-H), 4.75 (dd,  $J$  = 4.8Hz, 2H), 4.64 (m, 1H), 4.59 (m, 2H), 4.03 (d,  $J$  = 6Hz, 1H), 2.33(s, 6H), 2.21 (s, 6H), 2.1 (s, 6H); FAB-MS:  $m/z$  (%): 1139.5(70) [ $\text{M}^+$ ]; UV/Vis ( $\text{CH}_2\text{Cl}_2$ ):  $\lambda_{\text{max}}$  ( $\epsilon \times 10^{-4} \text{ M}^{-1}\text{cm}^{-1}$ ): 436 (4.6), 470 (5.2), 498 (6.4). elemental analysis: calcd (%) for  $\text{C}_{61}\text{H}_{33}\text{F}_{15}\text{N}_4\text{S}$ : C 64.33, H 2.92, N 4.92; found: C 63.75, H 2.65, N 4.35.

**10**: The second orange band (after the green fraction **8**) which was eluted with dichloromethane/petroleum ether (2:3) gave **10** in (0.065g, 15.2%);  $^1\text{H}$  NMR (300 MHz,  $\text{CDCl}_3$ , 25° C, TMS):  $\delta$  = 17.83 (brs, 1H, NH), 13.74 (m, 1H), 12.46 (d,  $J$  = 3.8Hz, 1H), 12.16 (d,  $J$  = 3.8Hz, 4H), 6.64 (d,  $J$  = 9Hz, 4H, Ar-H), 4.97 (brs, 1H, NH), 4.9 (dd,  $J$  = 4.8Hz, 2H), 4.79 (m, 1H), 4.73 (m, 2H), 4.21 (d,  $J$  = 6Hz, 1H), 2.15(s, 6H), 2.13 (s, 6H), 2.1 (s, 6H); FAB-MS:  $m/z$  (%): 1187.85(70) [ $\text{M}^+$ ]; UV/Vis ( $\text{CH}_2\text{Cl}_2$ ):  $\lambda_{\text{max}}$  ( $\epsilon \times 10^{-4} \text{ M}^{-1}\text{cm}^{-1}$ ): 426 (6.1), 466 (6.9), 492 (8.3). elemental analysis: calcd (%) for  $\text{C}_{61}\text{H}_{33}\text{F}_{15}\text{N}_4\text{Se}$ : C 61.78, H 2.80, N 4.72; found: C 61.35, H 2.73, N 4.25.

Scan: 21  
TIC: 275204 (Max Inten : 35965) Base: m/z 154; 3.4%FS

R.T.: 2:19.4

#Ions: 36

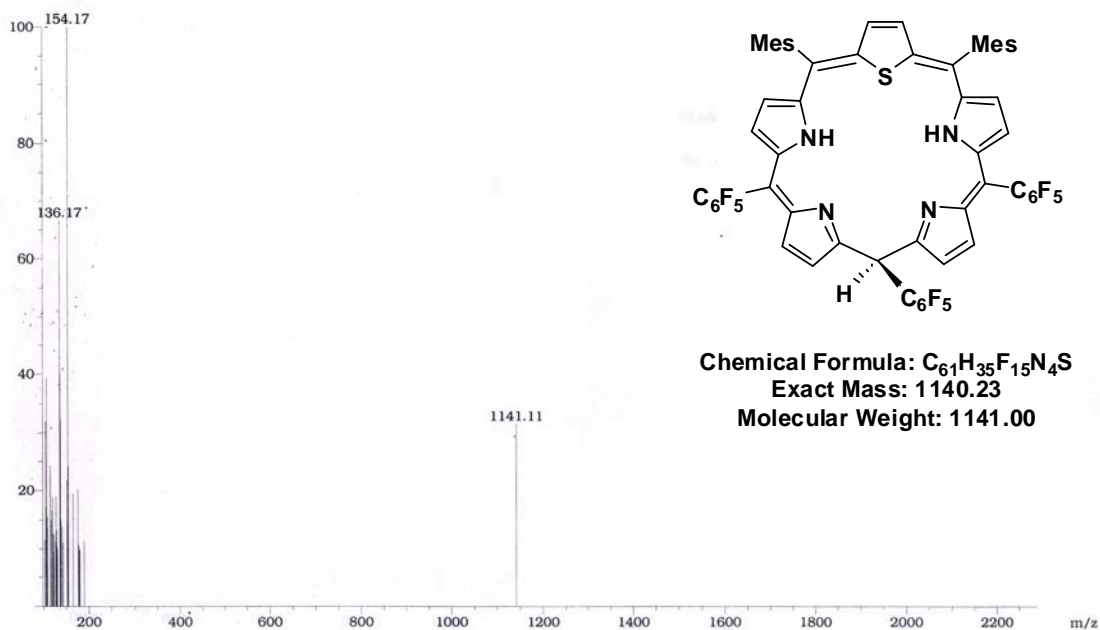

Figure 1: FAB Mass Spectrum of 7

Scan: 33  
TIC: 38347 (Max Inten : 7149) Base: m/z 107; .7%FS

R.T.: 3:25.3

#Ions: 7

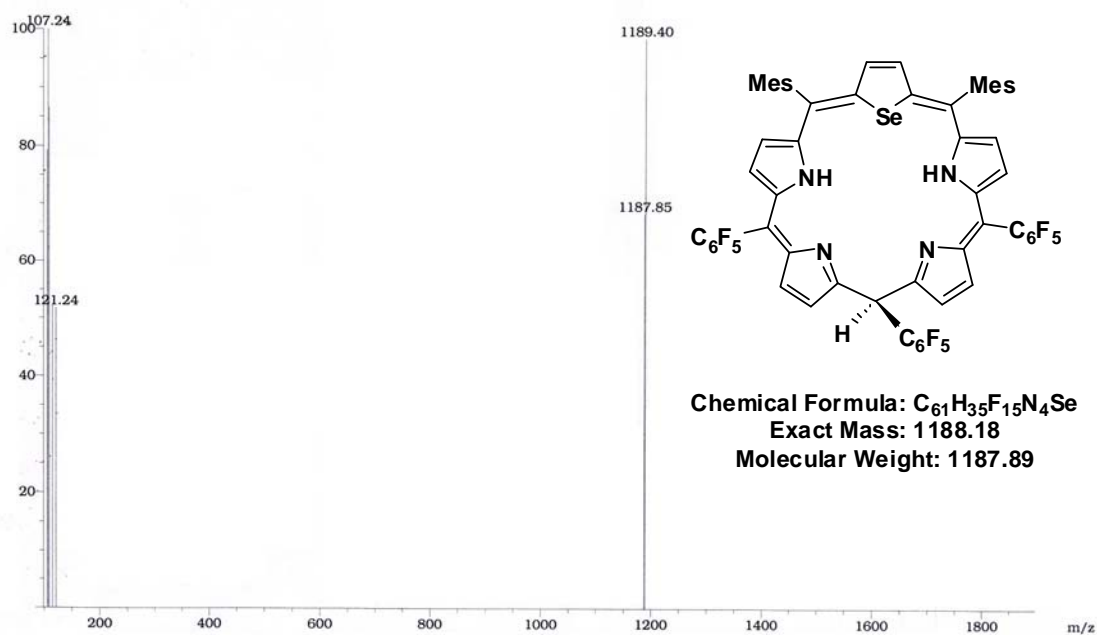

Figure 2: FAB Mass Spectrum of 8

Scan: 30  
TIC: 79750 (Max Inten : 13997) Base: m/z 648; 1.3%FS

R.T.: 3:07.3

#Ions: 14

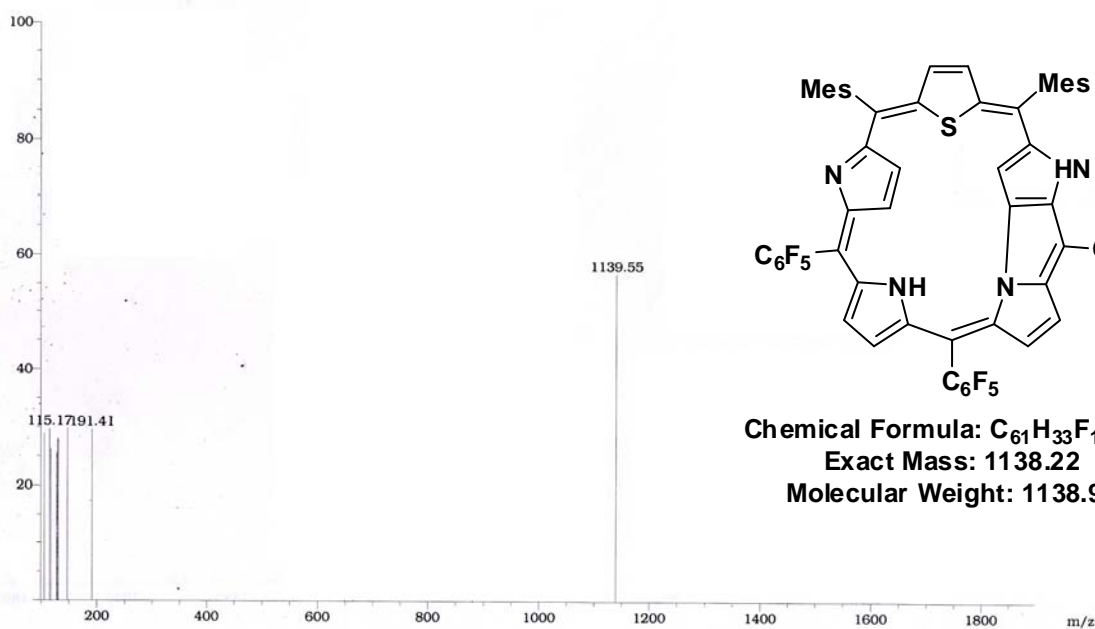

Figure 3: FAB Mass Spectrum of 9

Scan: 15  
TIC: 212072 (Max Inten : 10333) Base: m/z 105; 1%FS

R.T.: 2:13.2

#Ions: 4

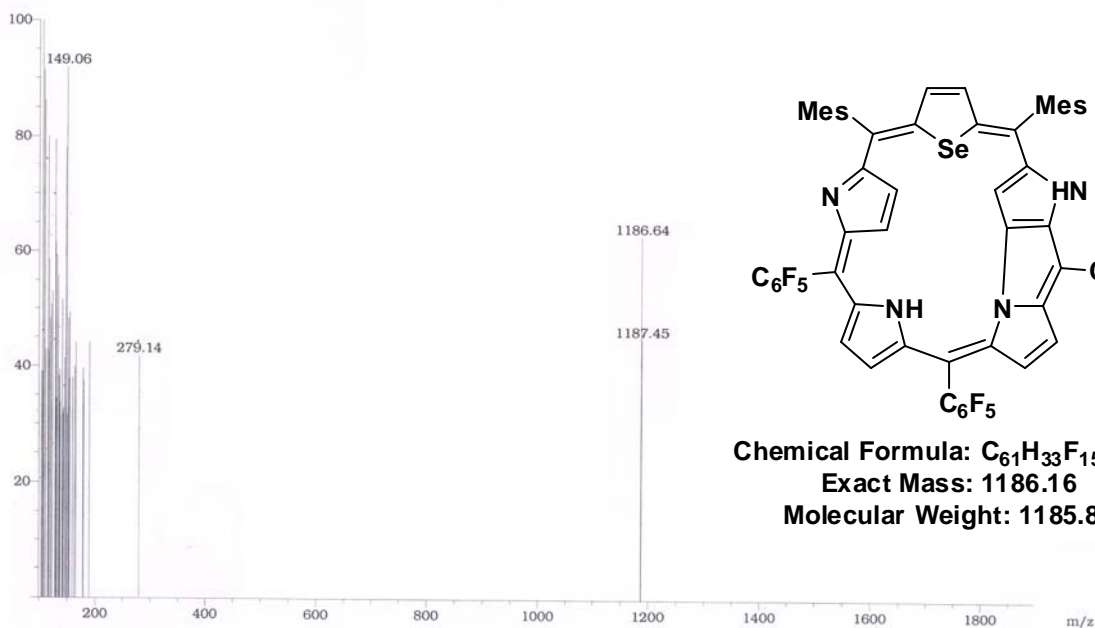

Figure 4: FAB Mass Spectrum of 10

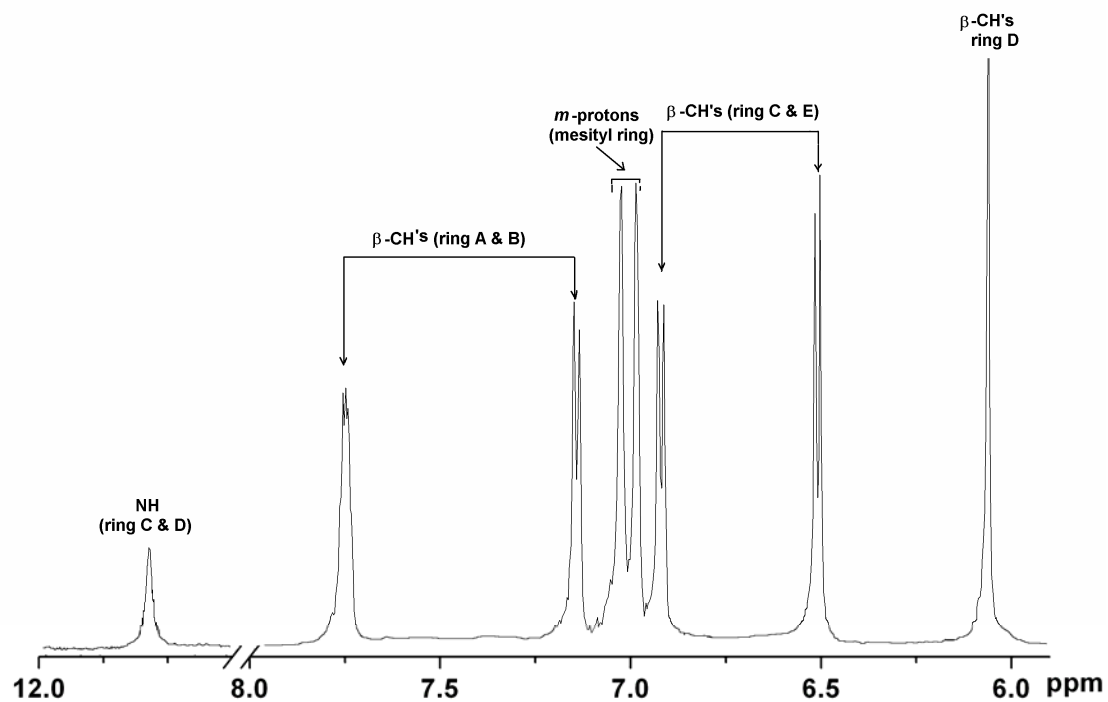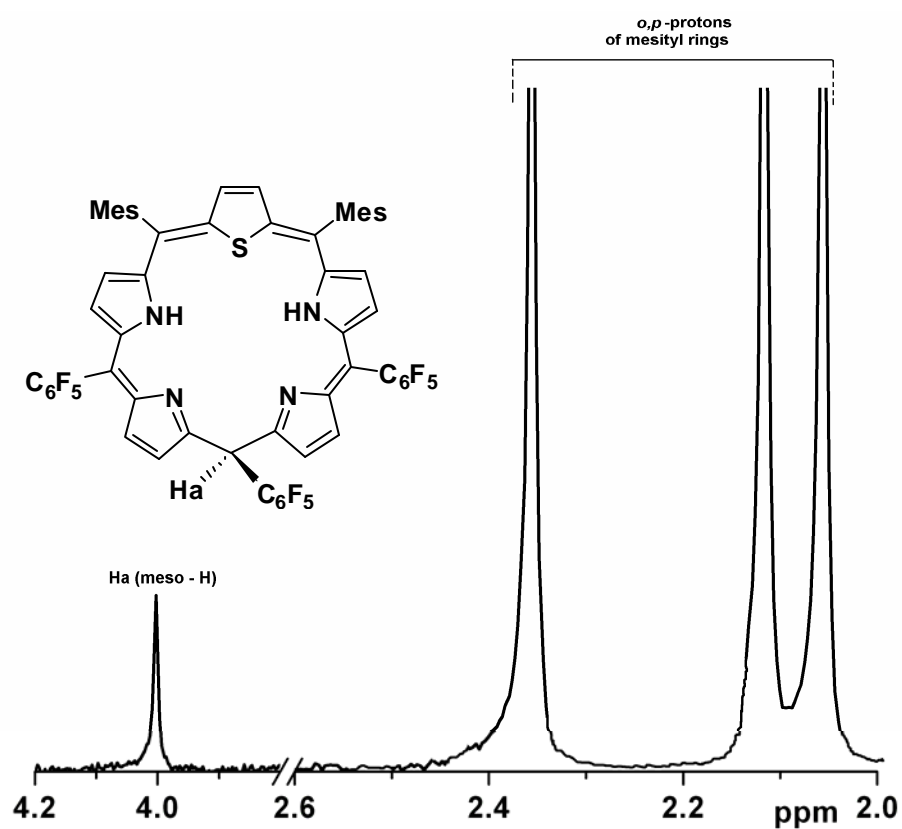

Figure 5:  $^1\text{H}$  NMR spectrum of **7** in  $\text{CD}_2\text{Cl}_2$  at 298 K  
(assignments marked are obtained from  $^1\text{H}$ - $^1\text{H}$  COSY spectrum)

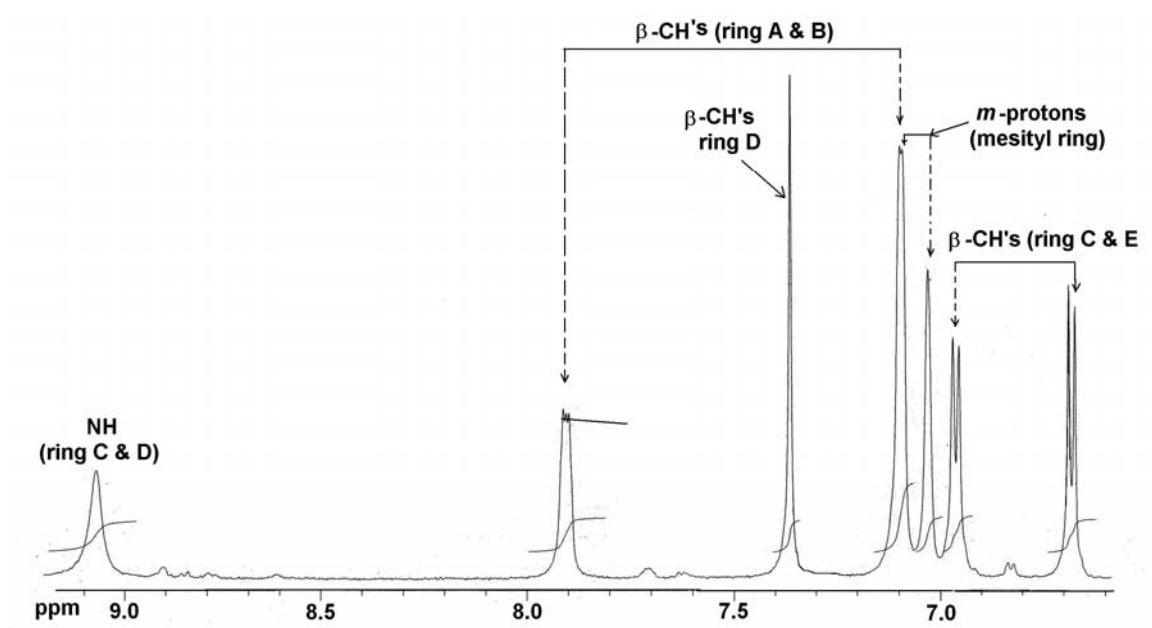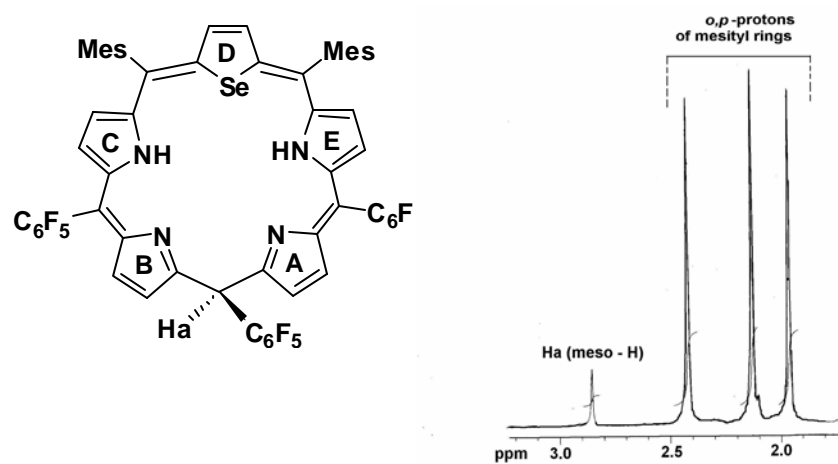

Figure 6:  $^1\text{H}$  NMR spectrum of **8** in  $\text{CD}_2\text{Cl}_2$  at 298 K  
(assignments marked are obtained from  $^1\text{H}$ - $^1\text{H}$  COSY spectrum)

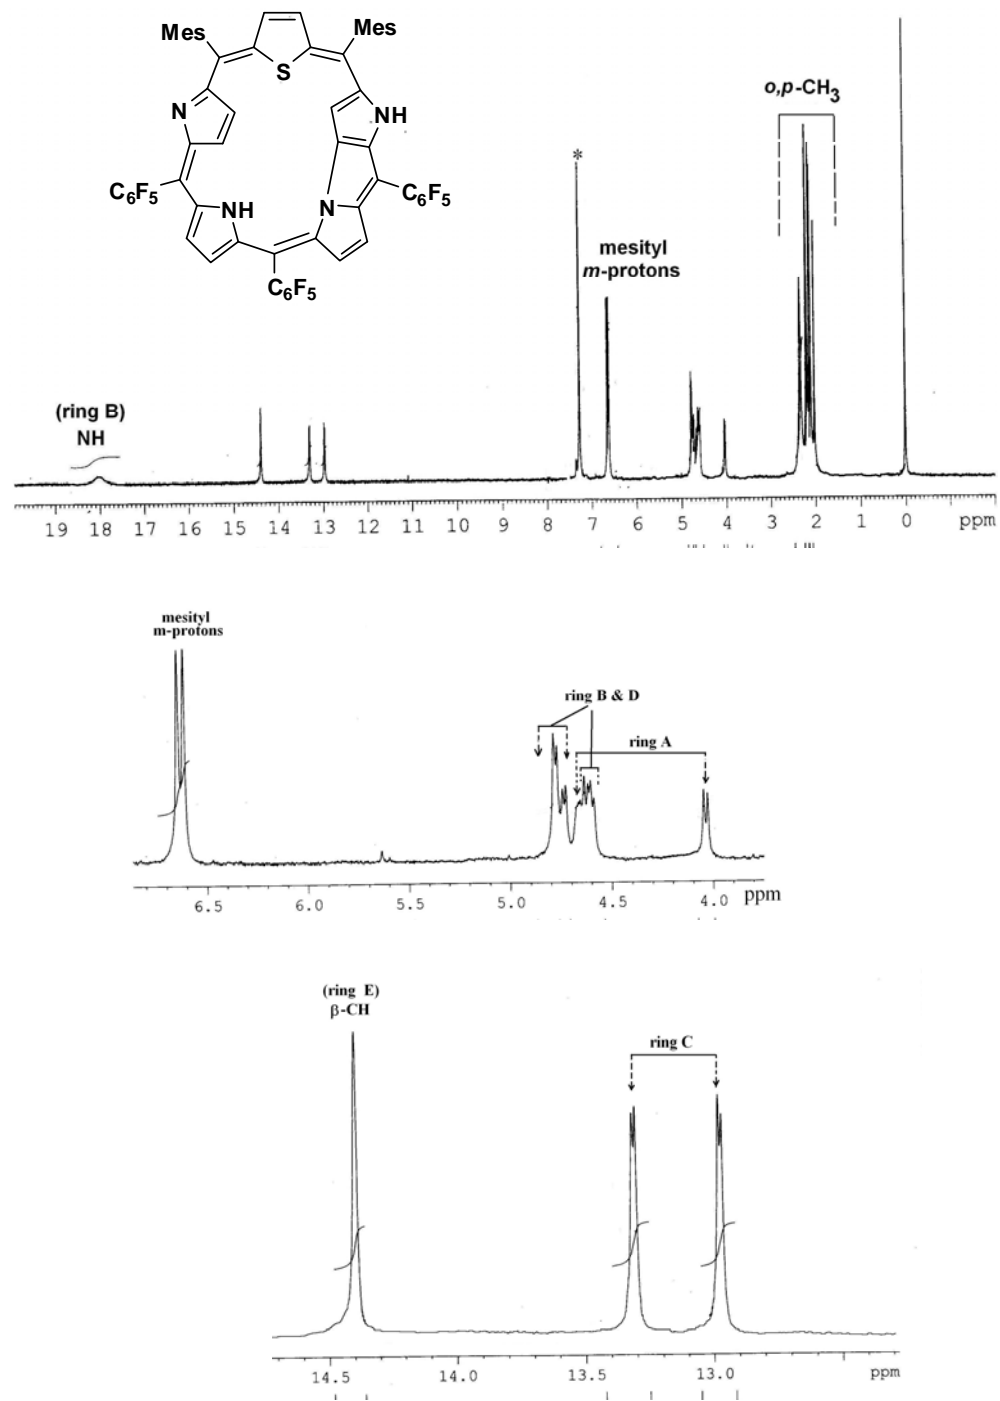

**Figure 7:**  $^1\text{H}$  NMR spectrum of 9 in  $\text{CD}_2\text{Cl}_2$  at 298 K  
(assignments marked are obtained from  $^1\text{H}$ - $^1\text{H}$  COSY spectrum)



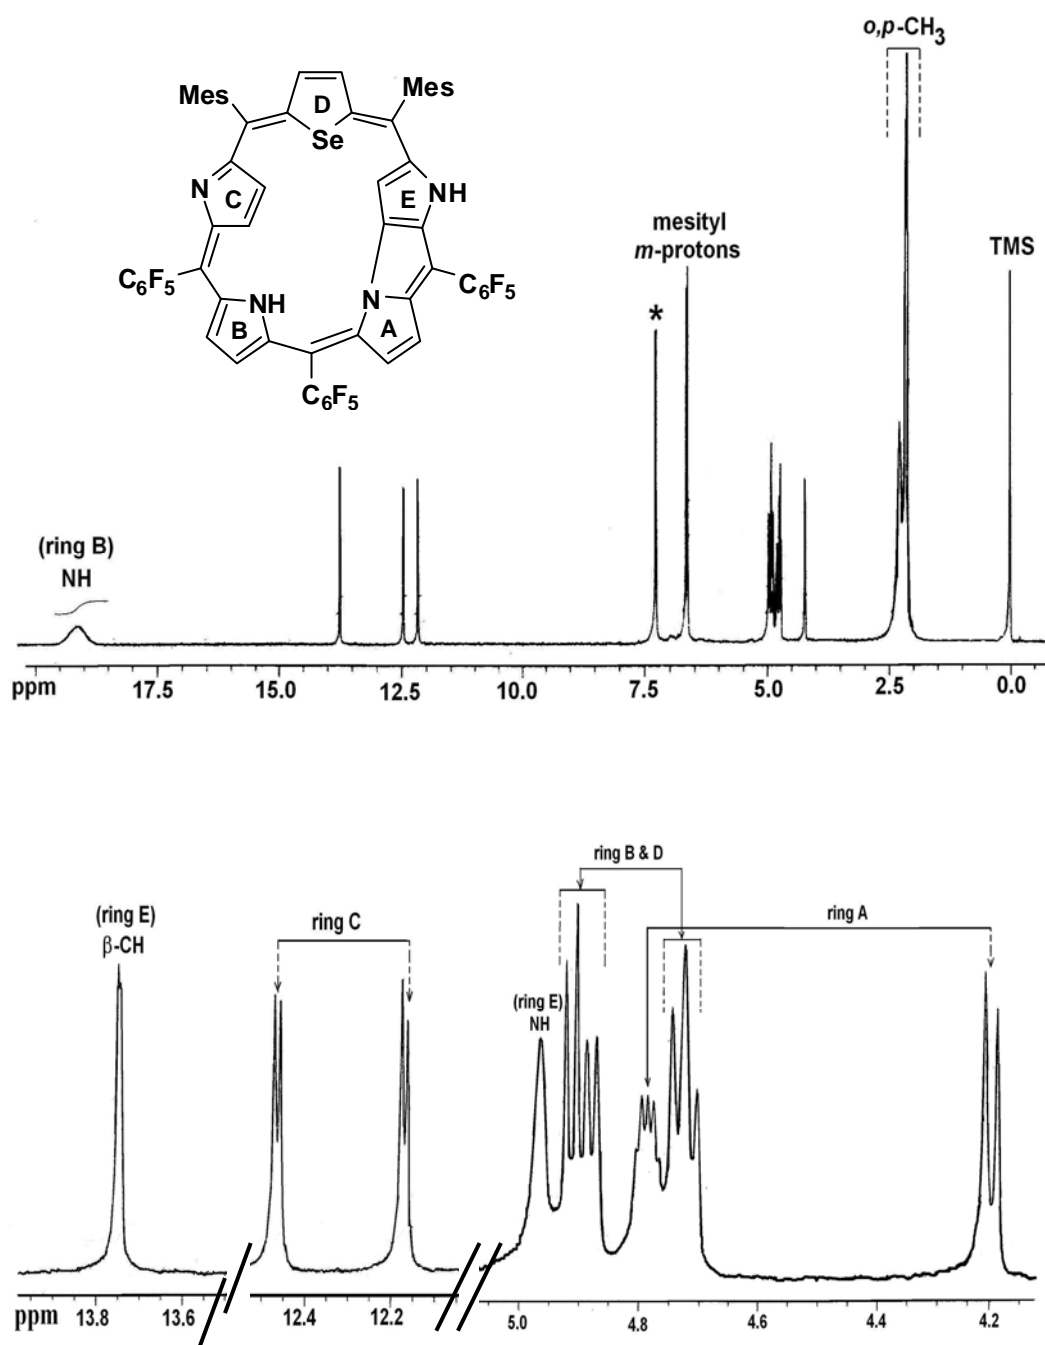

Figure 8:  $^1\text{H}$  NMR spectrum of 10 in  $\text{CD}_2\text{Cl}_2$  at 298 K  
(assignments marked are obtained from  $^1\text{H}$ - $^1\text{H}$  COSY spectrum)

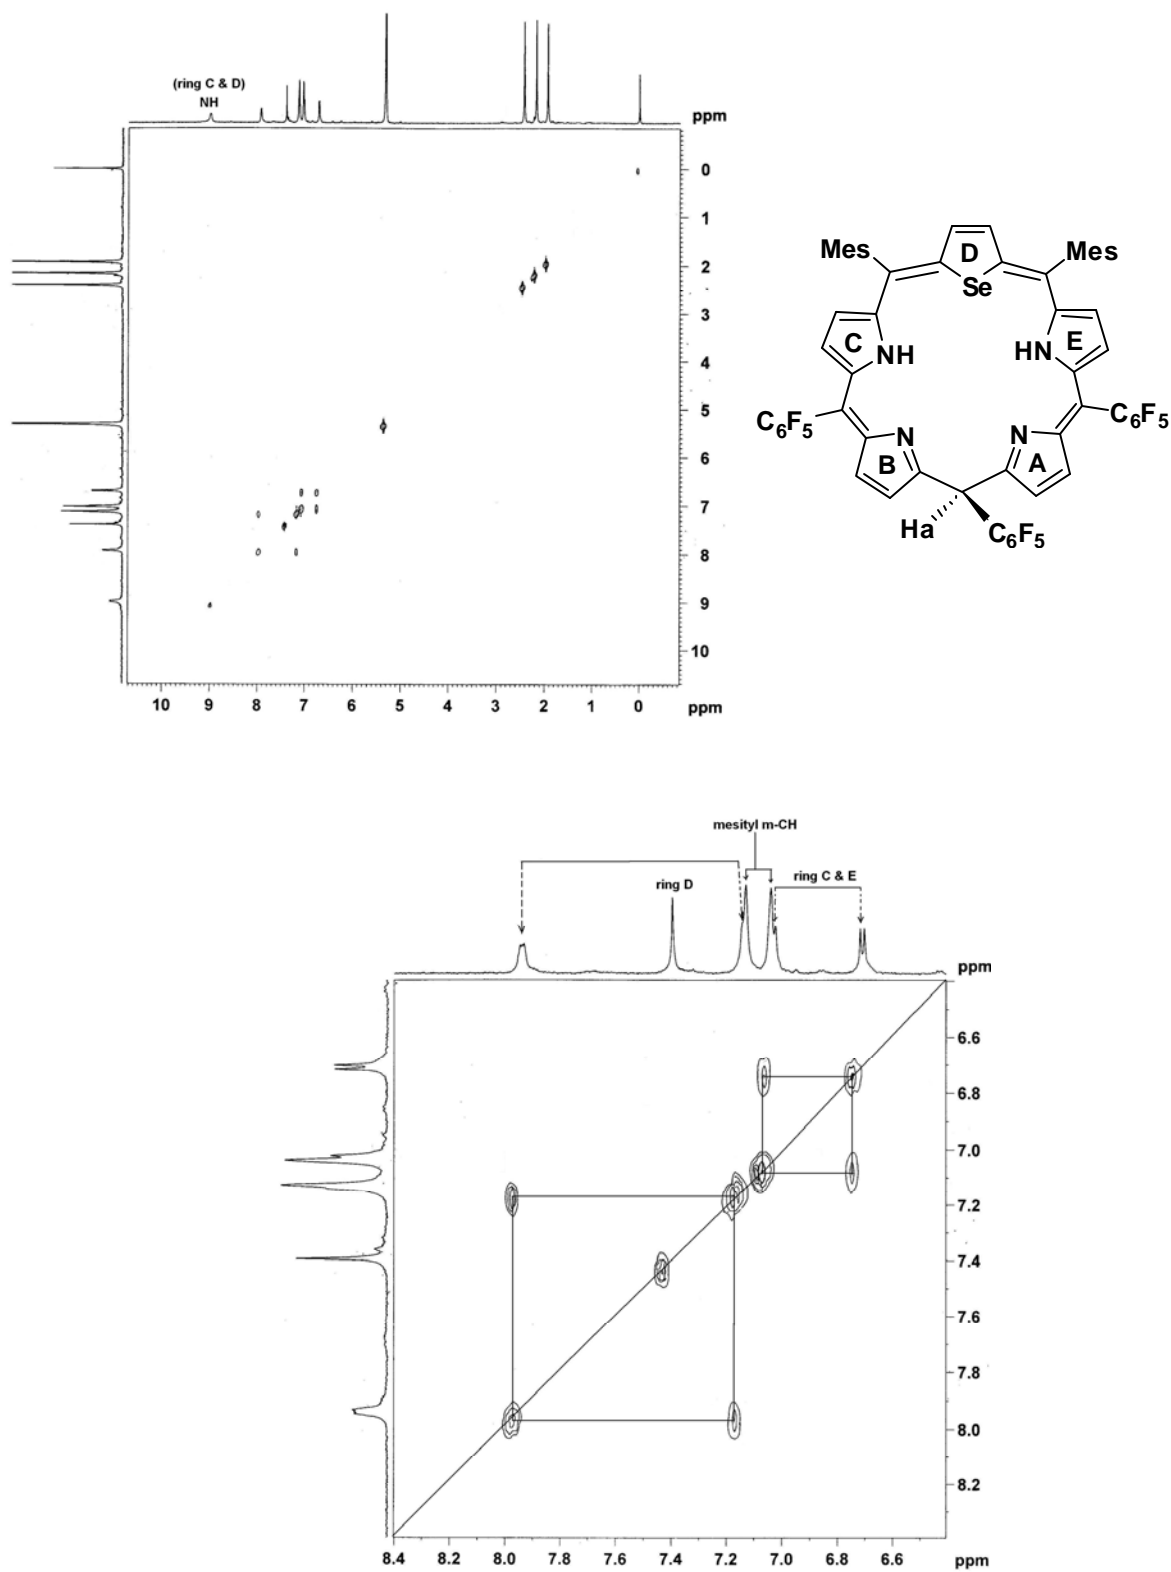

Figure 8:  $^1\text{H}$ - $^1\text{H}$  COSY spectrum of **8** in  $\text{CD}_2\text{Cl}_2$  with assignments observed.

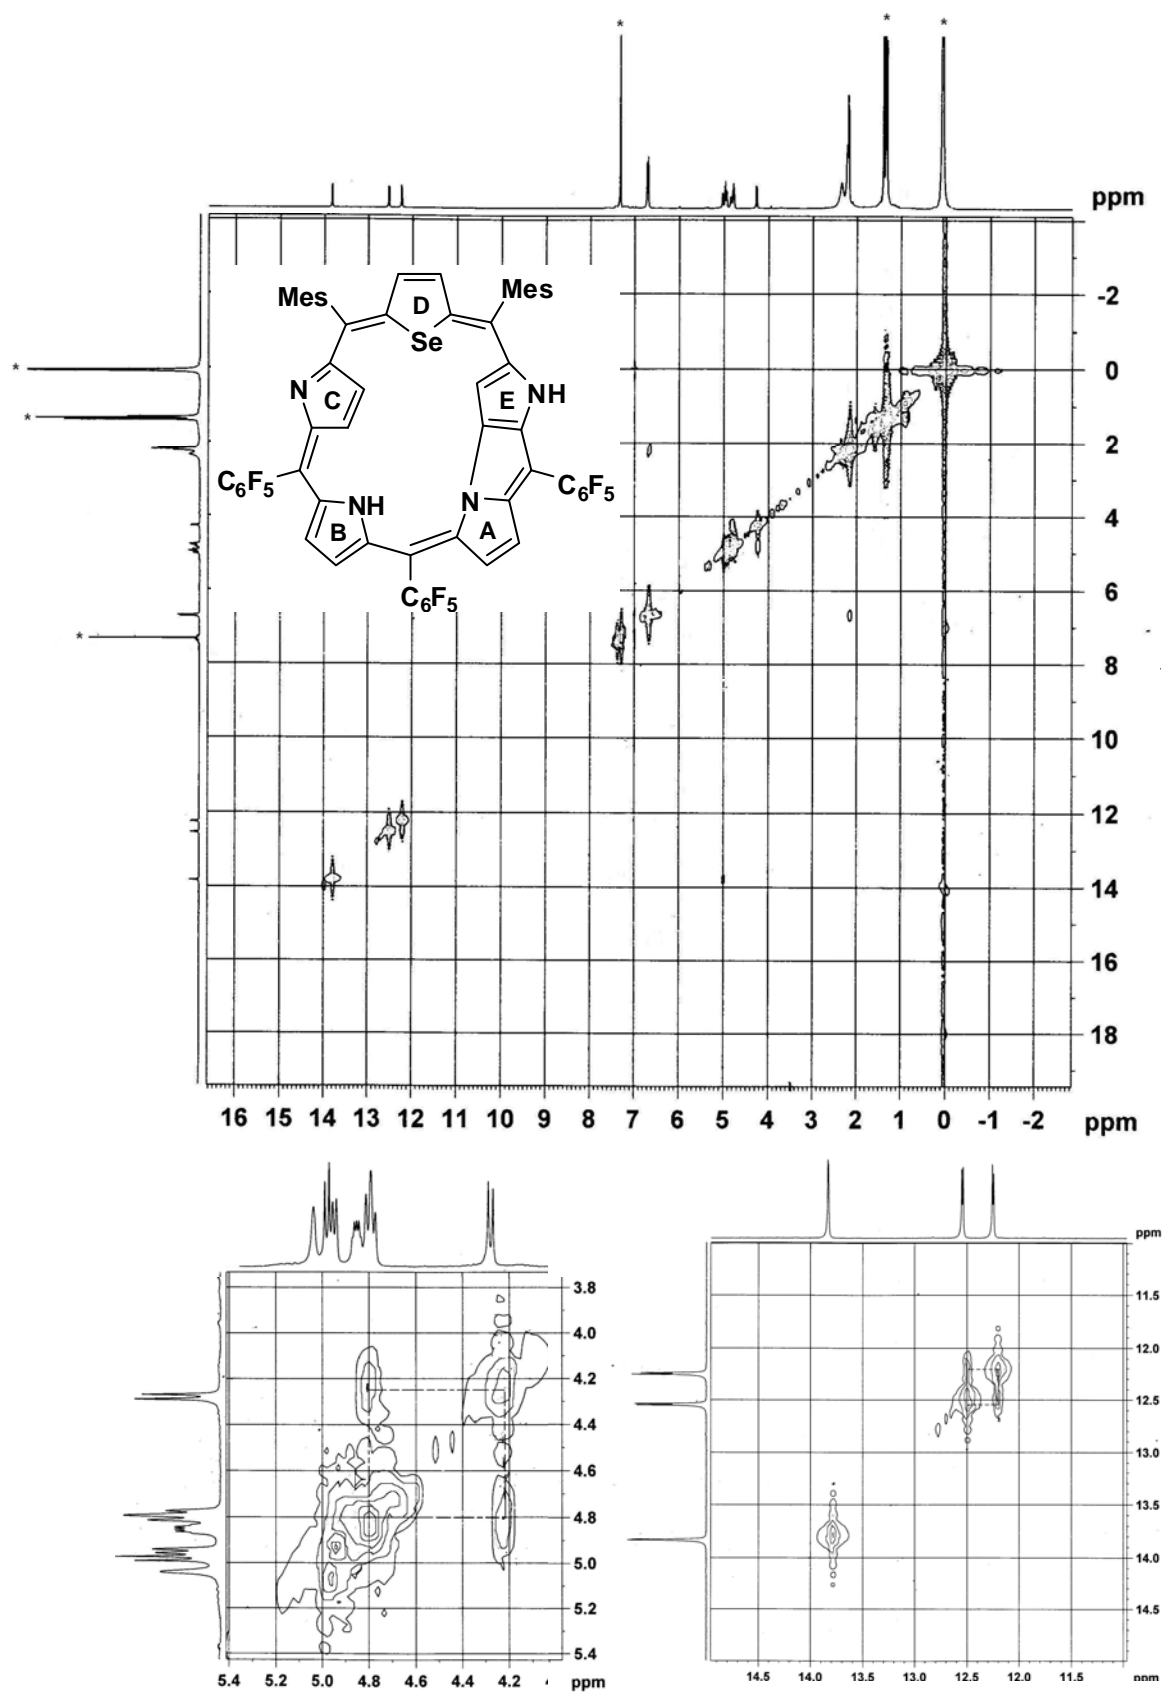

Figure 8:  $^1\text{H}$ - $^1\text{H}$  COSY spectrum of 10 in  $\text{CDCl}_3$  with assignments observed.

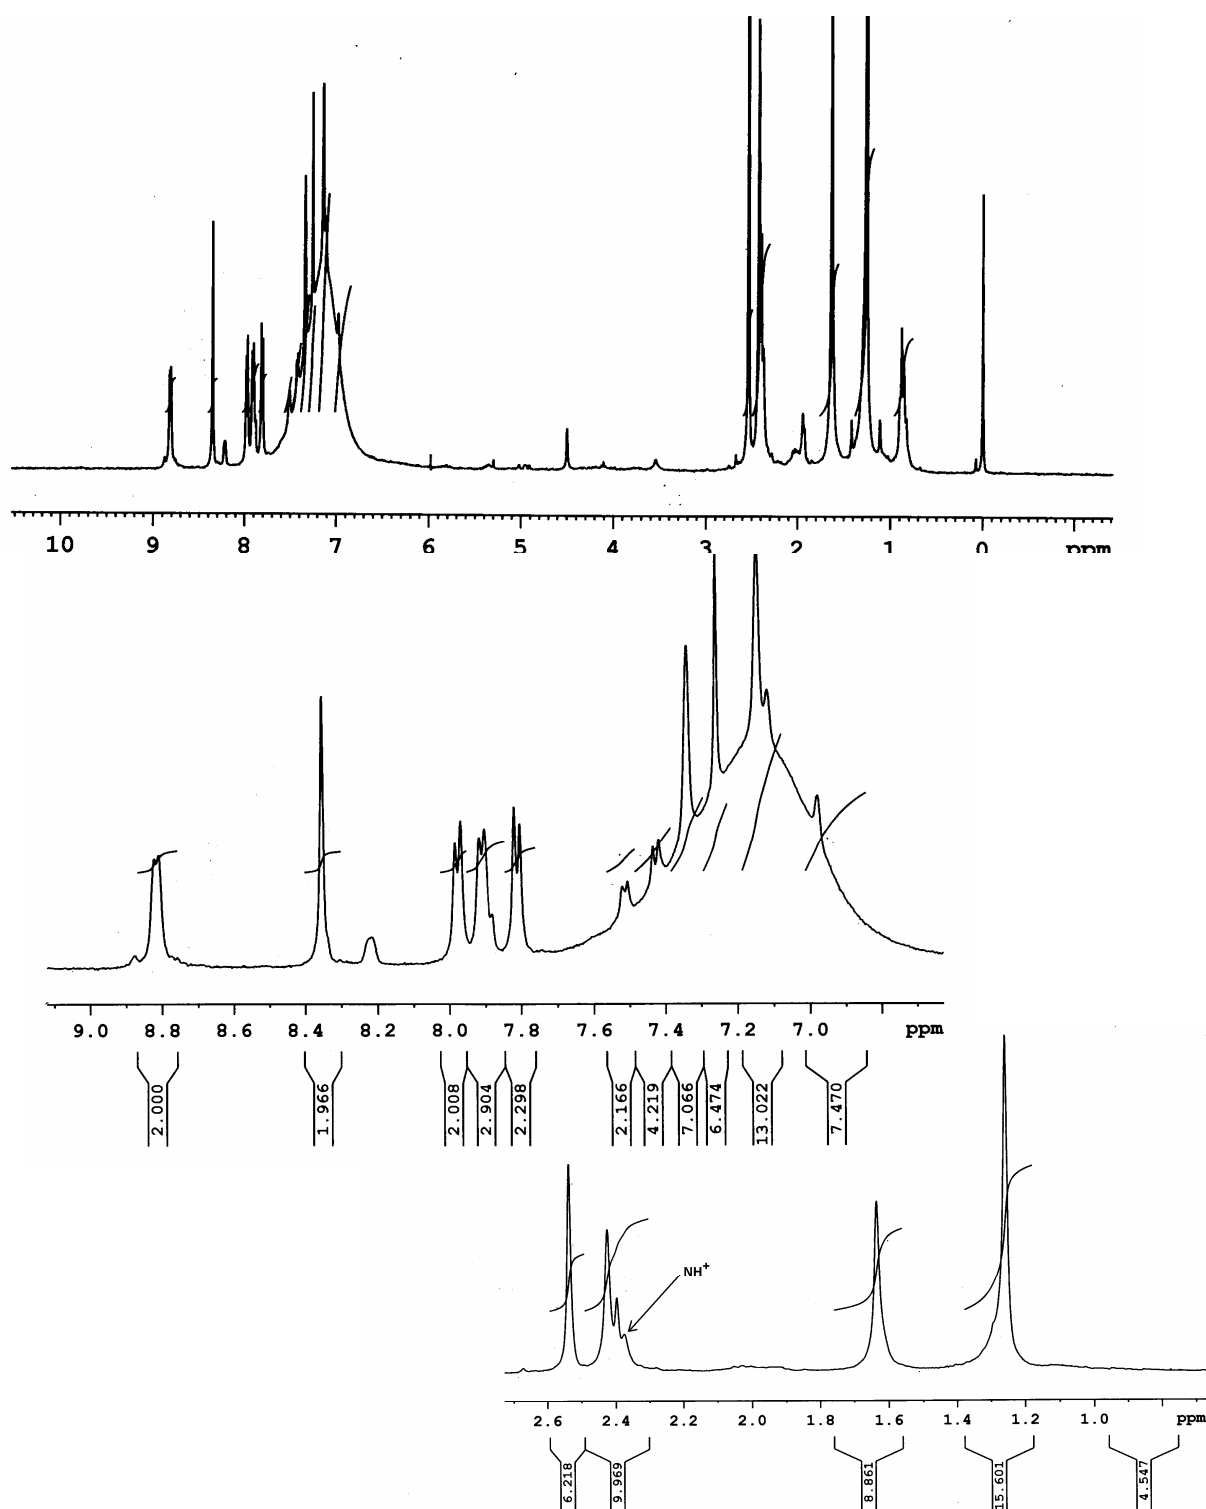

**Figure 9:  $^1\text{H}$  NMR spectrum of protonated form of 8 in  $\text{CDCl}_3$  at 298 K**  
 (Protonation experiments were carried out using diluted solution of TFA in  $\text{CDCl}_3$  with 8)

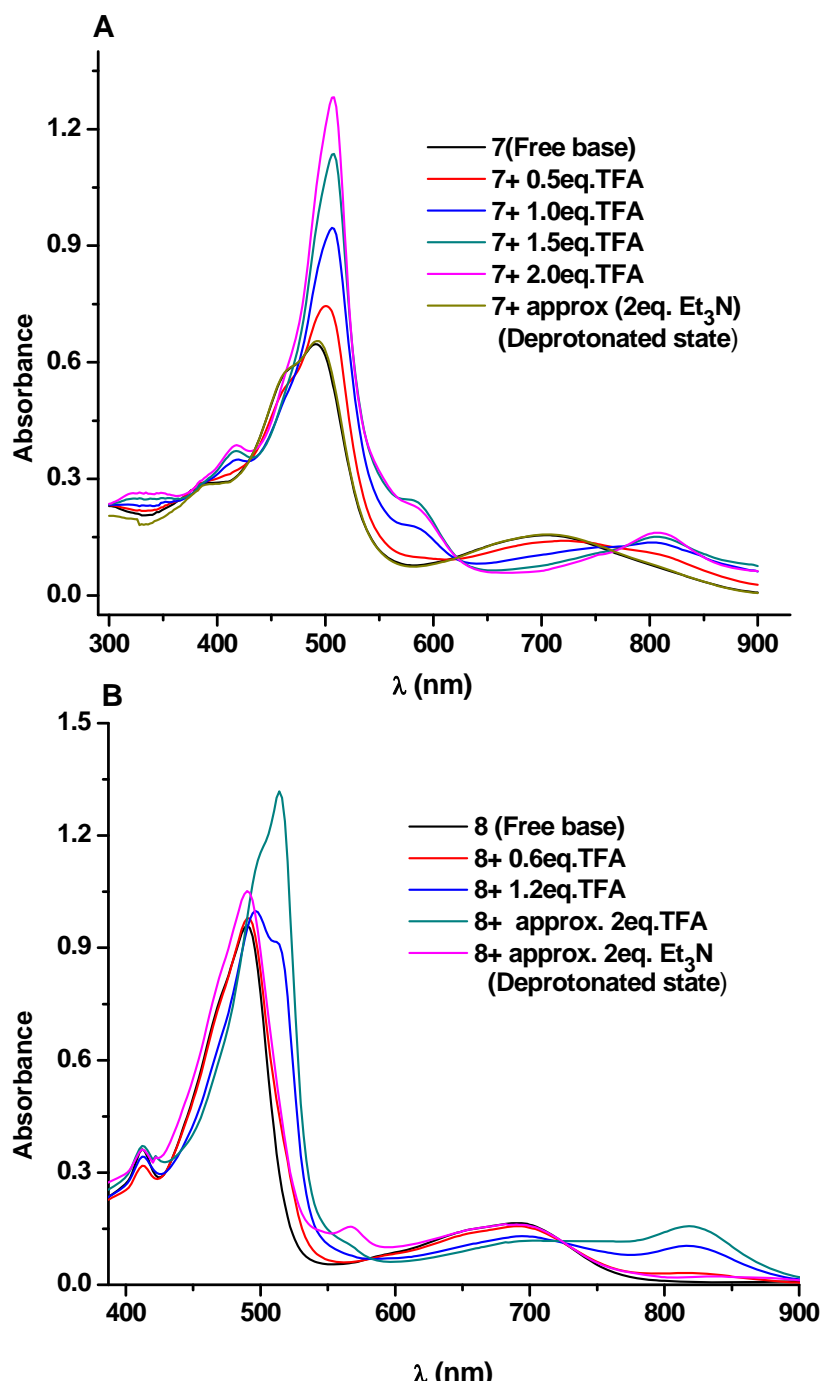

**Figure 10:** Electronic absorption spectra of (A) **7** (black), **7** with  $0.28 \times 10^{-4} \text{M}$  TFA (pink) and deprotonated **7** with 2eq.  $\text{Et}_3\text{N}$  (brown) (B) **8** (black), **8** with  $0.23 \times 10^{-4} \text{M}$  TFA (green) and deprotonated **8** with 2eq.  $\text{Et}_3\text{N}$  (pink) in  $\text{CH}_2\text{Cl}_2$

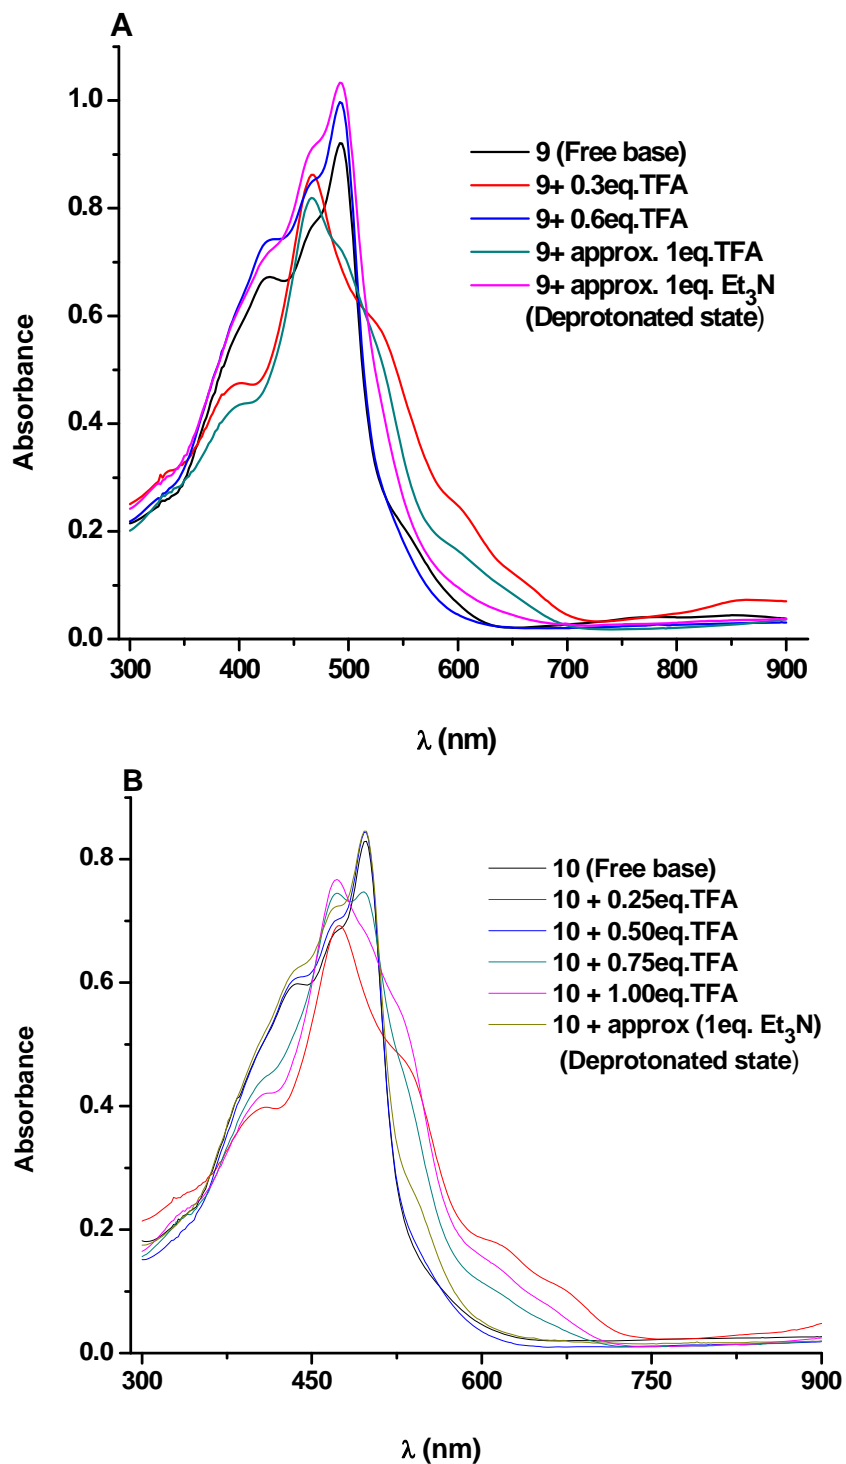

**Figure 11:** Electronic absorption spectra of (A) 9 (black), 9 with  $0.06 \times 10^{-4} \text{M}$  TFA (brown) and deprotonated 9 with 1eq.  $\text{Et}_3\text{N}$  (pink) (B) 10 (black), 10 with  $0.14 \times 10^{-4} \text{M}$  TFA (pink) and deprotonated 10 with 2eq.  $\text{Et}_3\text{N}$  (brown) in  $\text{CH}_2\text{Cl}_2$

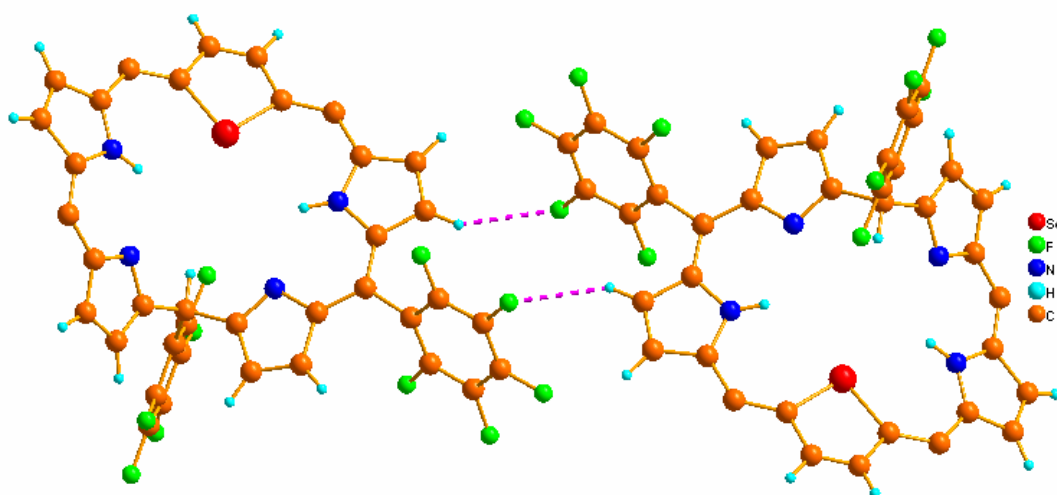

**Figure 12 (a): View of a dimer through C—H...F interactions; C22—H22...F14;  
2.59Å, 146.29(4)°**

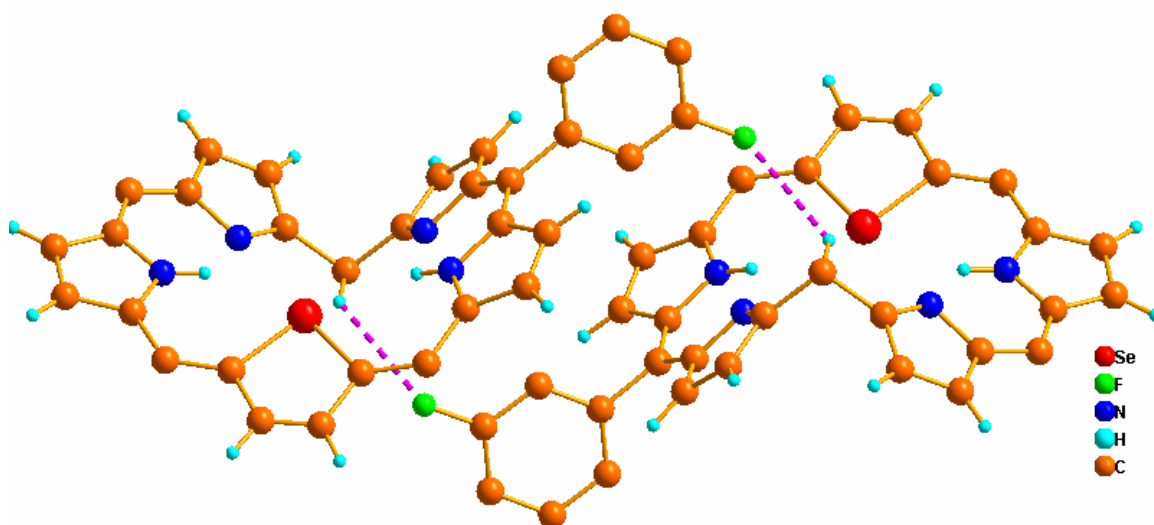

**Figure 12 (b): View of a dimer through C—H...F interactions; C15—H15...F2;  
2.816Å, 127.87(6)°**

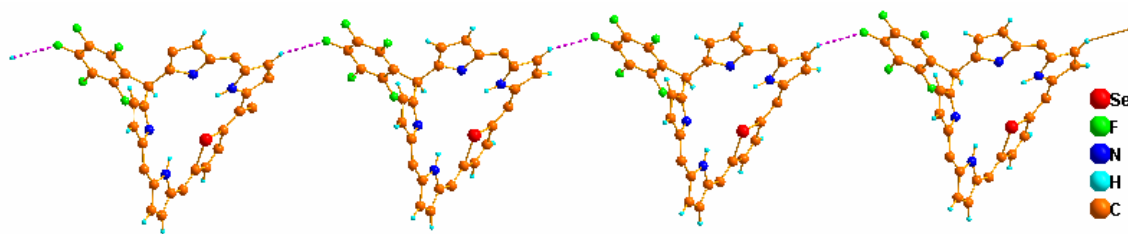

**Figure 13 (a):**One dimensional array through C—H---F interactions, C8—H8---F8; 2.696Å, 155.782°

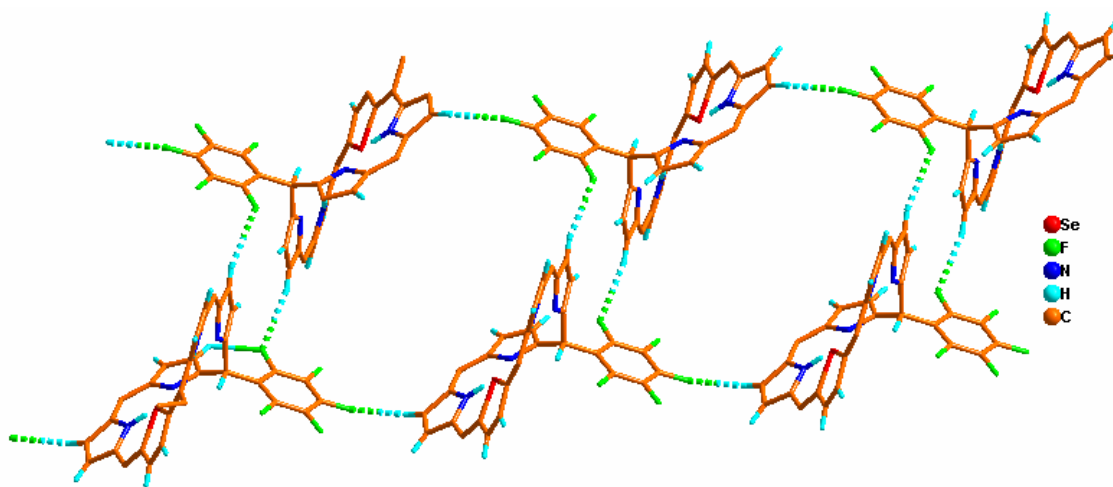

**Figure 13 (b):**Two dimensional helical structure through C—H---F interactions, C18—H18---F6; 2.738Å, 165.334° and C8—H8---F8; 2.696Å, 155.78(4)°



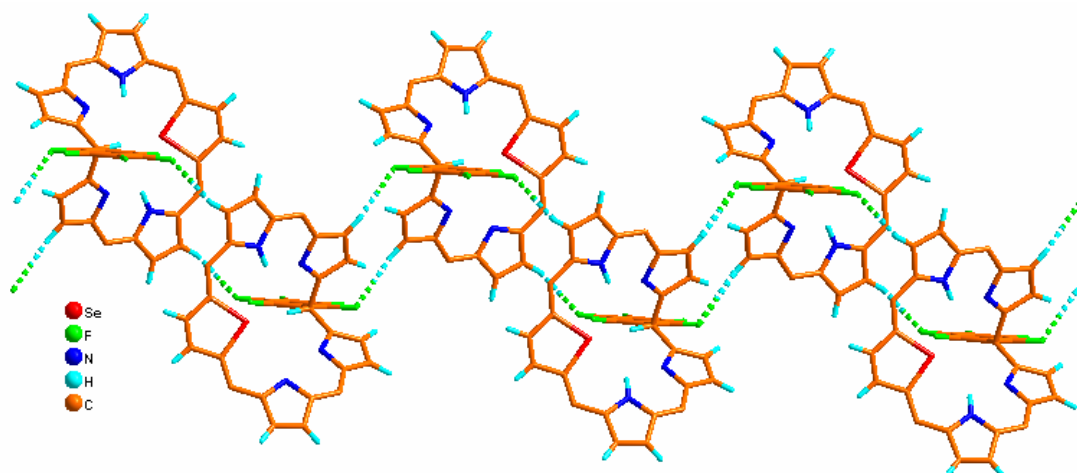

**Figure 14 (a):** Two dimensional network through C—H...F interactions, C18—H18...F6; 2.738Å, 165.334° and C23—H23...F9; 2.696Å, 161.13(4)°

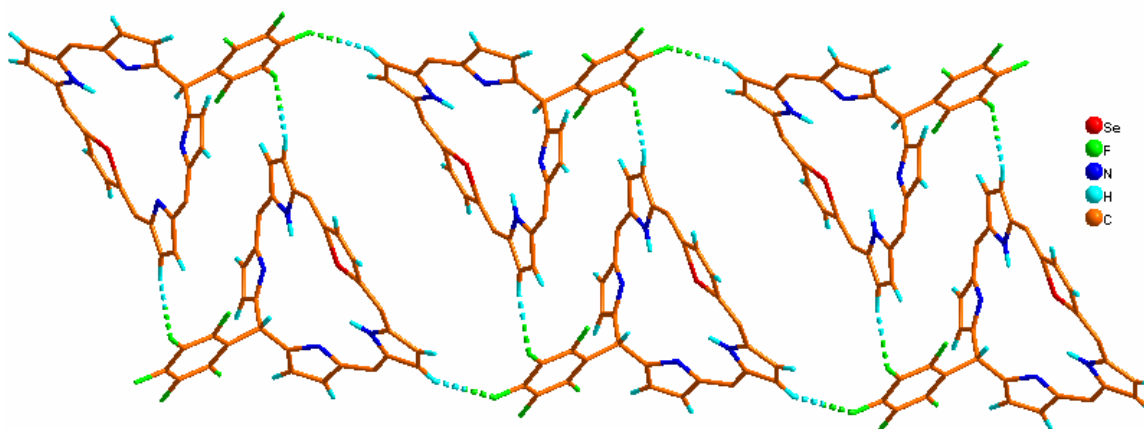

**Figure 14 (b):** Two dimensional network through C—H...F interactions, C8—H8...F9; 2.696Å, 155.78(4)° and C23—H23...F9; 2.696Å, 161.13(4)°

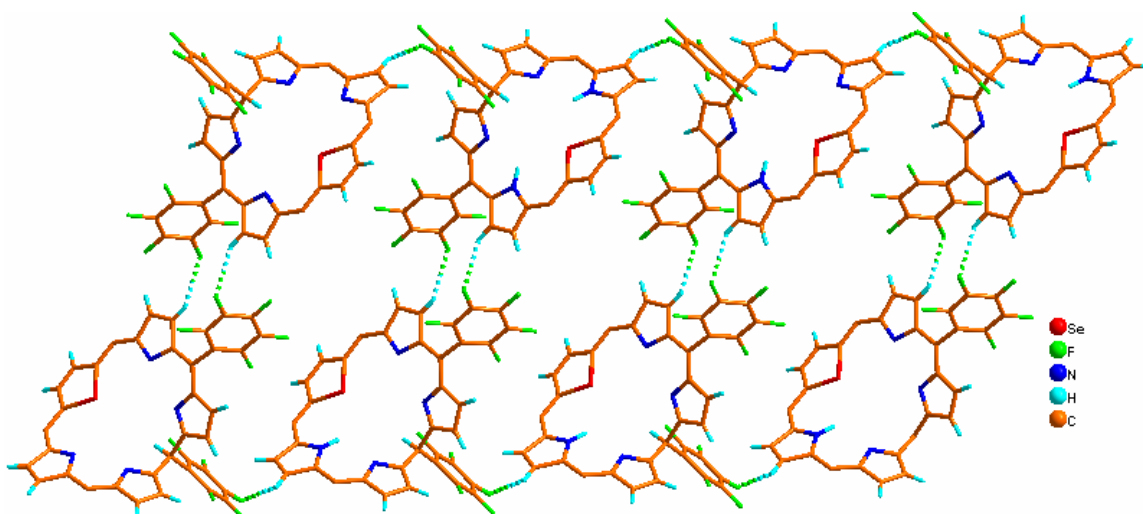

**Figure 15 (a):** Two dimensional network through C—H...F interactions, C8—H8...F9; 2.696Å, 155.78(4)° and C22—H22...F14; 2.592Å, 146.29(4)°

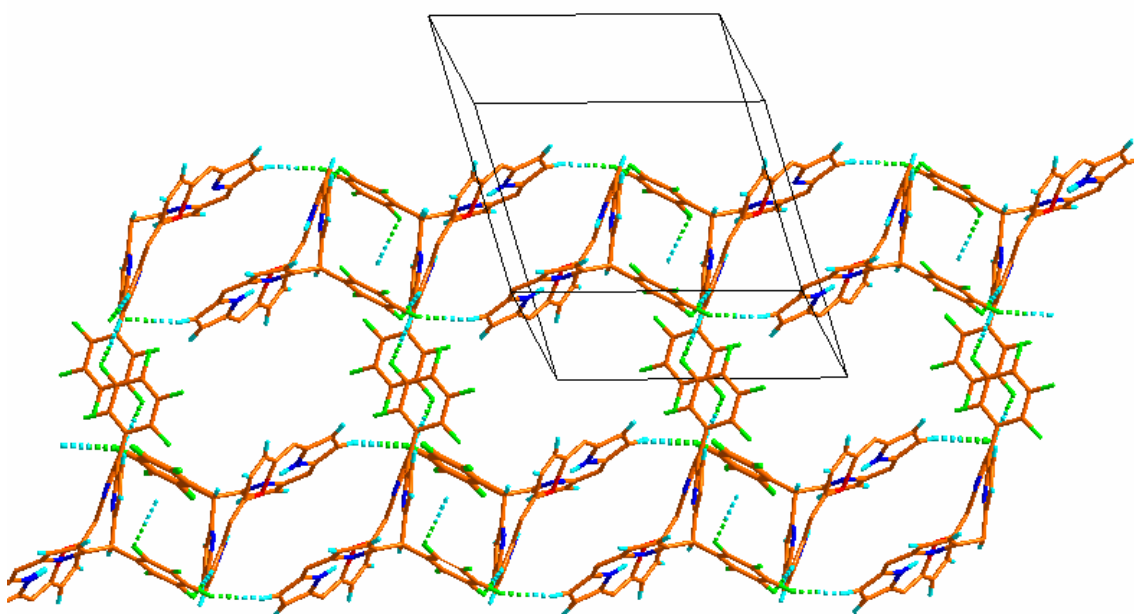

**Figure 15 (b):** View of 3D caged-like architecture through all combined C—H...F interactions

**Table 1: Crystal data and structure refinement for 8**

|                                   |                                                                   |                          |
|-----------------------------------|-------------------------------------------------------------------|--------------------------|
| Identification code               | 25sepem                                                           |                          |
| Empirical formula                 | C <sub>67</sub> H <sub>49</sub> F <sub>15</sub> N <sub>4</sub> Se |                          |
| Formula weight                    | 1274.06                                                           |                          |
| Temperature                       | 100(2) K                                                          |                          |
| Wavelength                        | 0.71073 Å                                                         |                          |
| Crystal system                    | Triclinic                                                         |                          |
| Space group                       | P-1                                                               |                          |
| Unit cell dimensions              | a = 14.317 Å                                                      | $\alpha = 87.74^\circ$ . |
|                                   | b = 14.494 Å                                                      | $\beta = 69.23^\circ$ .  |
|                                   | c = 15.344 Å                                                      | $\gamma = 74.18^\circ$ . |
| Volume                            | 2858.5 Å <sup>3</sup>                                             |                          |
| Z                                 | 2                                                                 |                          |
| Density (calculated)              | 1.480 Mg/m <sup>3</sup>                                           |                          |
| Absorption coefficient            | 0.753 mm <sup>-1</sup>                                            |                          |
| F(000)                            | 1296                                                              |                          |
| Crystal size                      | 0.10 x 0.08 x 0.05 mm <sup>3</sup>                                |                          |
| Theta range for data collection   | 1.97 to 26.00°.                                                   |                          |
| Index ranges                      | -16 ≤ h ≤ 17, -17 ≤ k ≤ 17, -12 ≤ l ≤ 18                          |                          |
| Reflections collected             | 16276                                                             |                          |
| Independent reflections           | 11021 [R(int) = 0.0452]                                           |                          |
| Completeness to theta = 26.00°    | 98.0 %                                                            |                          |
| Absorption correction             | None                                                              |                          |
| Max. and min. transmission        | 0.9633 and 0.9285                                                 |                          |
| Refinement method                 | Full-matrix least-squares on F <sup>2</sup>                       |                          |
| Data / restraints / parameters    | 11021 / 0 / 721                                                   |                          |
| Goodness-of-fit on F <sup>2</sup> | 1.025                                                             |                          |
| Final R indices [I > 2sigma(I)]   | R1 = 0.0803, wR2 = 0.1849                                         |                          |
| R indices (all data)              | R1 = 0.1277, wR2 = 0.2237                                         |                          |
| Largest diff. peak and hole       | 1.302 and -0.716 e.Å <sup>-3</sup>                                |                          |
